# Supplementary material for: Examining the Eastern European heatwave of 2023 from a long-term perspective: the role of natural variability vs. anthropogenic factors
Source: Copernicus journal article supplement (doi:10.5194/egusphere-2024-1207), 2024-05-14
Supplement: Supplementary file 1 [file egusphere-2024-1207-supplement.pdf]

## **Supplementary file**

# **Examining the Eastern European heatwave of 2023 from a long-term perspective: the role of natural variability vs. anthropogenic factors**

Monica Ionita<sup>1,2\*</sup>, Petru Vaideanu<sup>2,3</sup>, Bogdan Antonescu<sup>2,3</sup>, Catalin Roibu<sup>2</sup>, Qiyun Ma<sup>1</sup> and Viorica Nagavciuc<sup>1,2</sup>

<sup>1</sup>Alfred Wegener Institute Helmholtz Centre for Polar and Marine Research, Bremerhaven, 27570, Germany

<sup>2</sup>Faculty of Forestry, Ștefan cel Mare University, Suceava, Romania

<sup>3</sup>Faculty of Physics, University of Bucharest, Măgurele, 077125, Romania

*Correspondence to:* Monica Ionita (Monica.Ionita@awi.de)

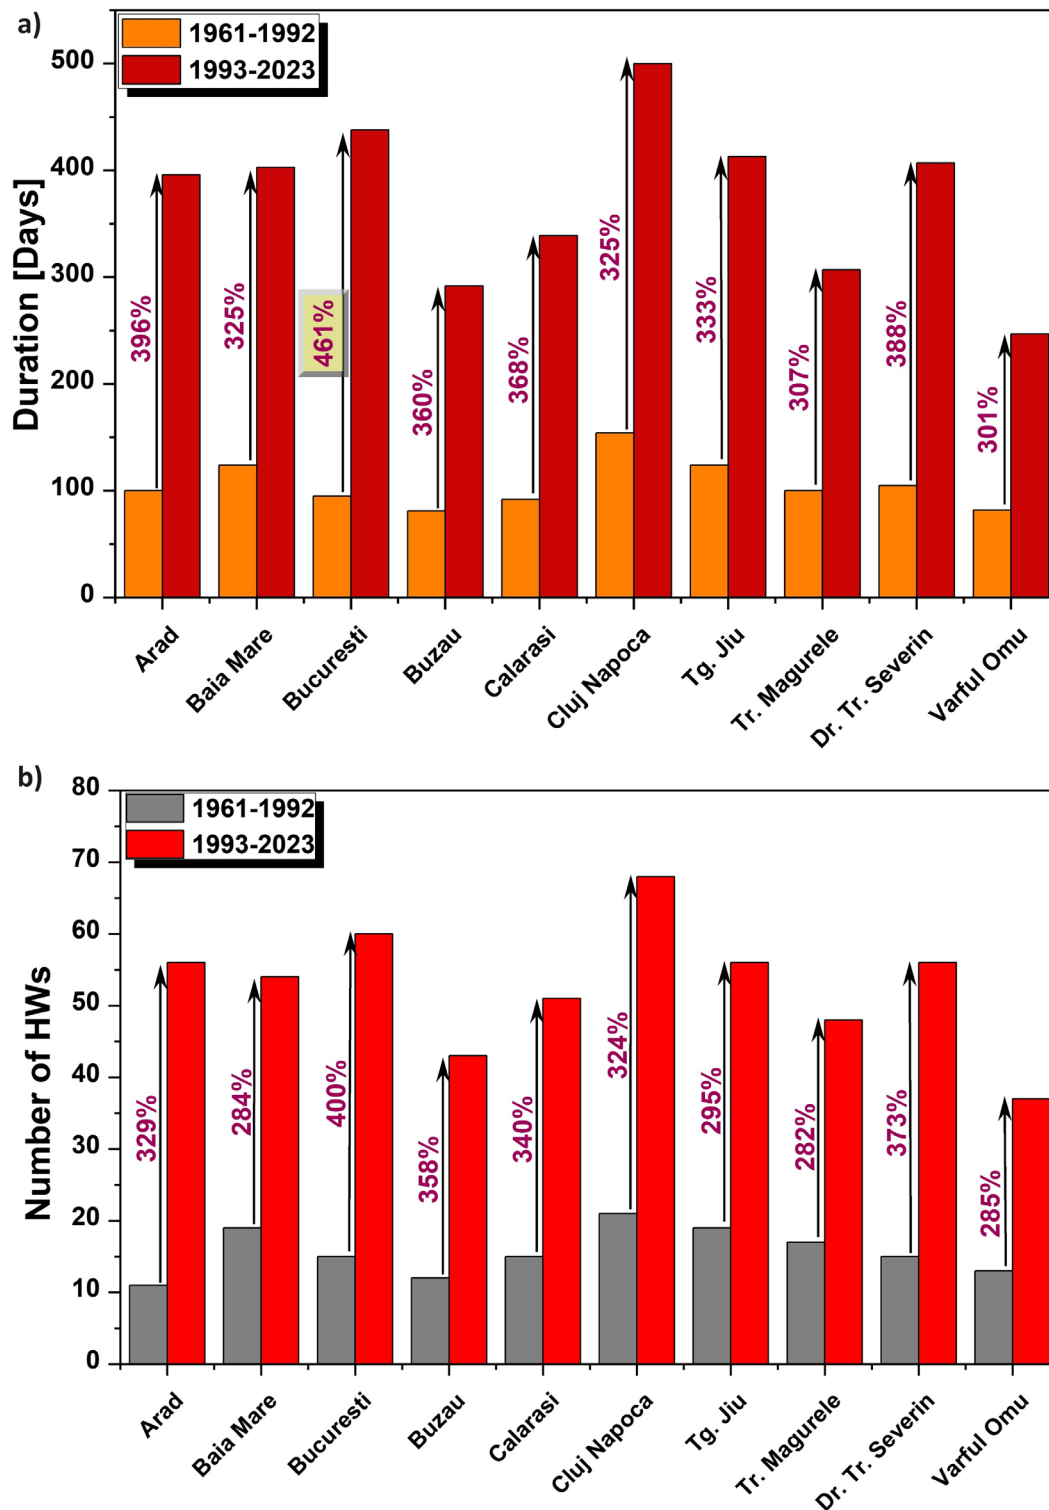

**Figure S1.** a) Distribution of the duration (i.e., sum of all days affected by a HW) over two periods, namely 1961 – 1992 (orange bars) and 1993 – 2023 (red bars), respectively and b) Distribution of the number of HWs (i.e., sum of all HWs) over two periods, namely 1961 – 1992 (gray bars) and 1993 – 2023 (red bars), respectively. The black arrows in a) and b) indicated the rate of change (as %) between the two analyzed period.

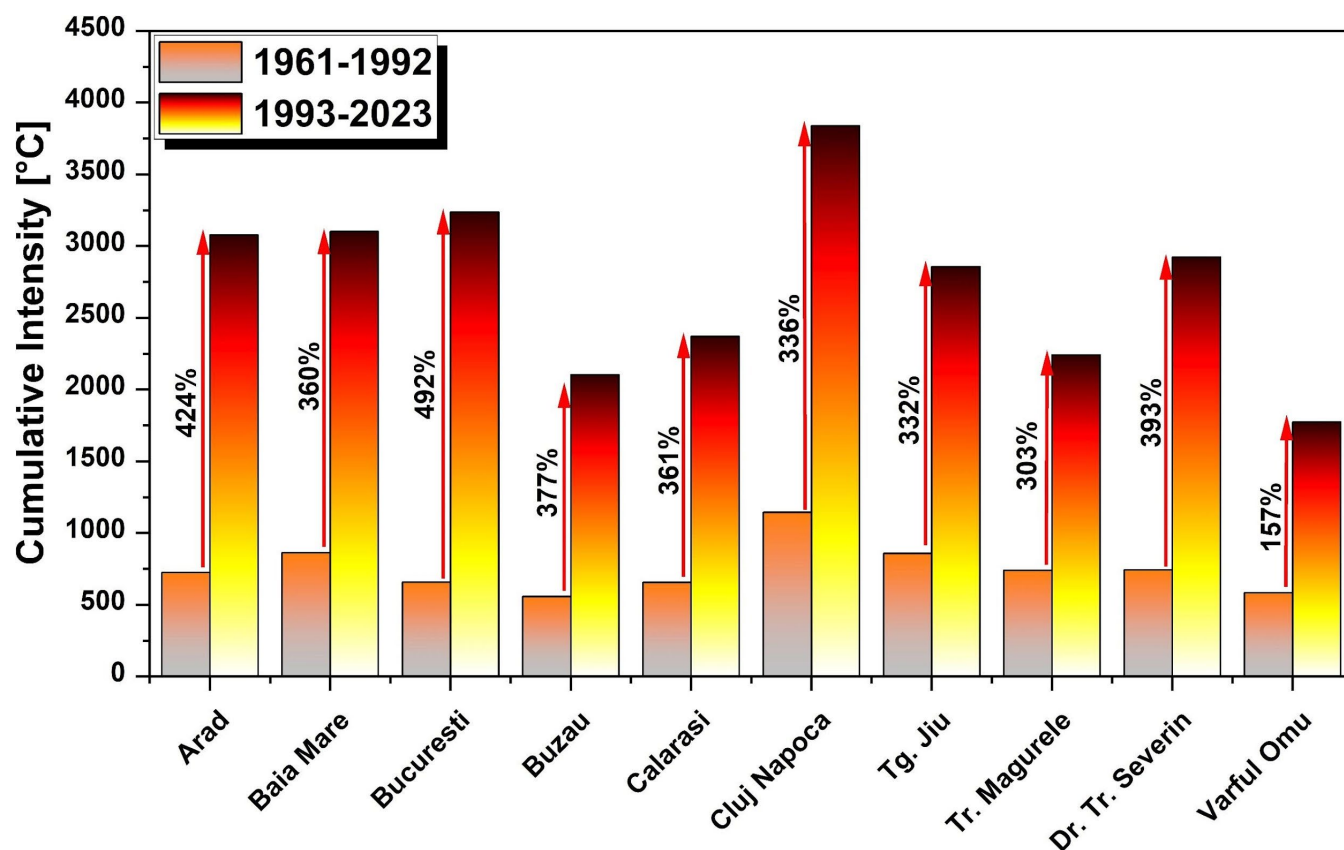

**Figure S2.** Distribution of the cumulative intensity (i.e., sum of daily maximum temperature anomaly over all days affected by a HW) over two periods, namely 1961 – 1992 (grey-to-orange bars) and 1993 – 2023 (yellow-to-red bars), respectively. The black arrows indicate the rate of change (as %) between the two analyzed period.

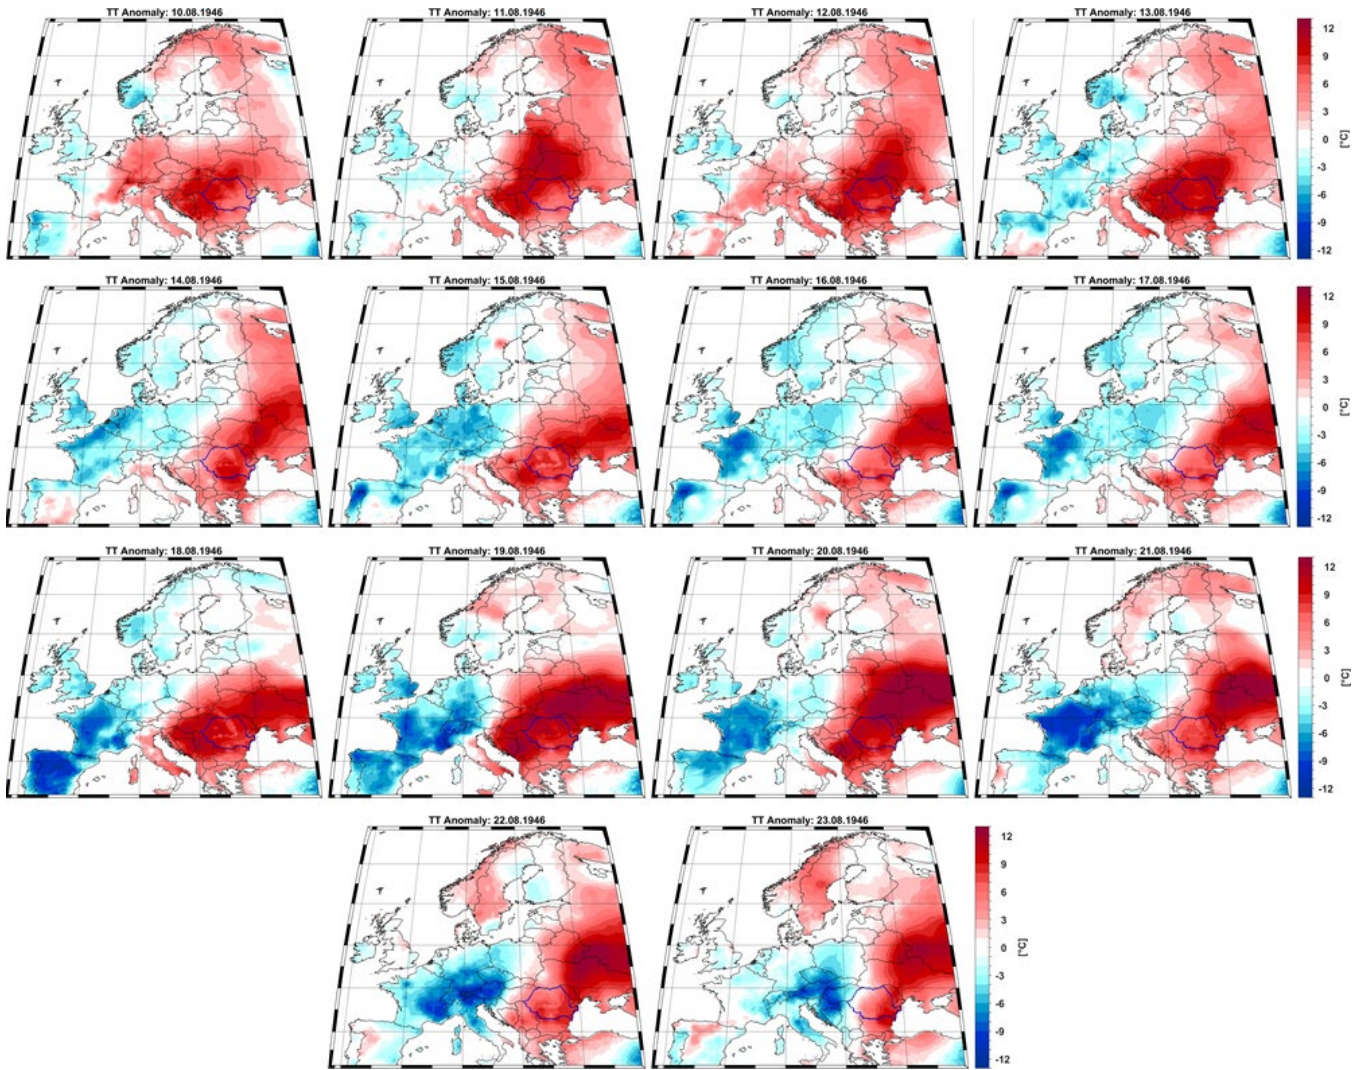

**Figure S3.** Spatial and temporal evolution of the daily maximum temperature anomaly over Europe over the period 10.08.1946 – 23.08.1946. The anomalies are computed relative to the climatological period 1971 – 2000.



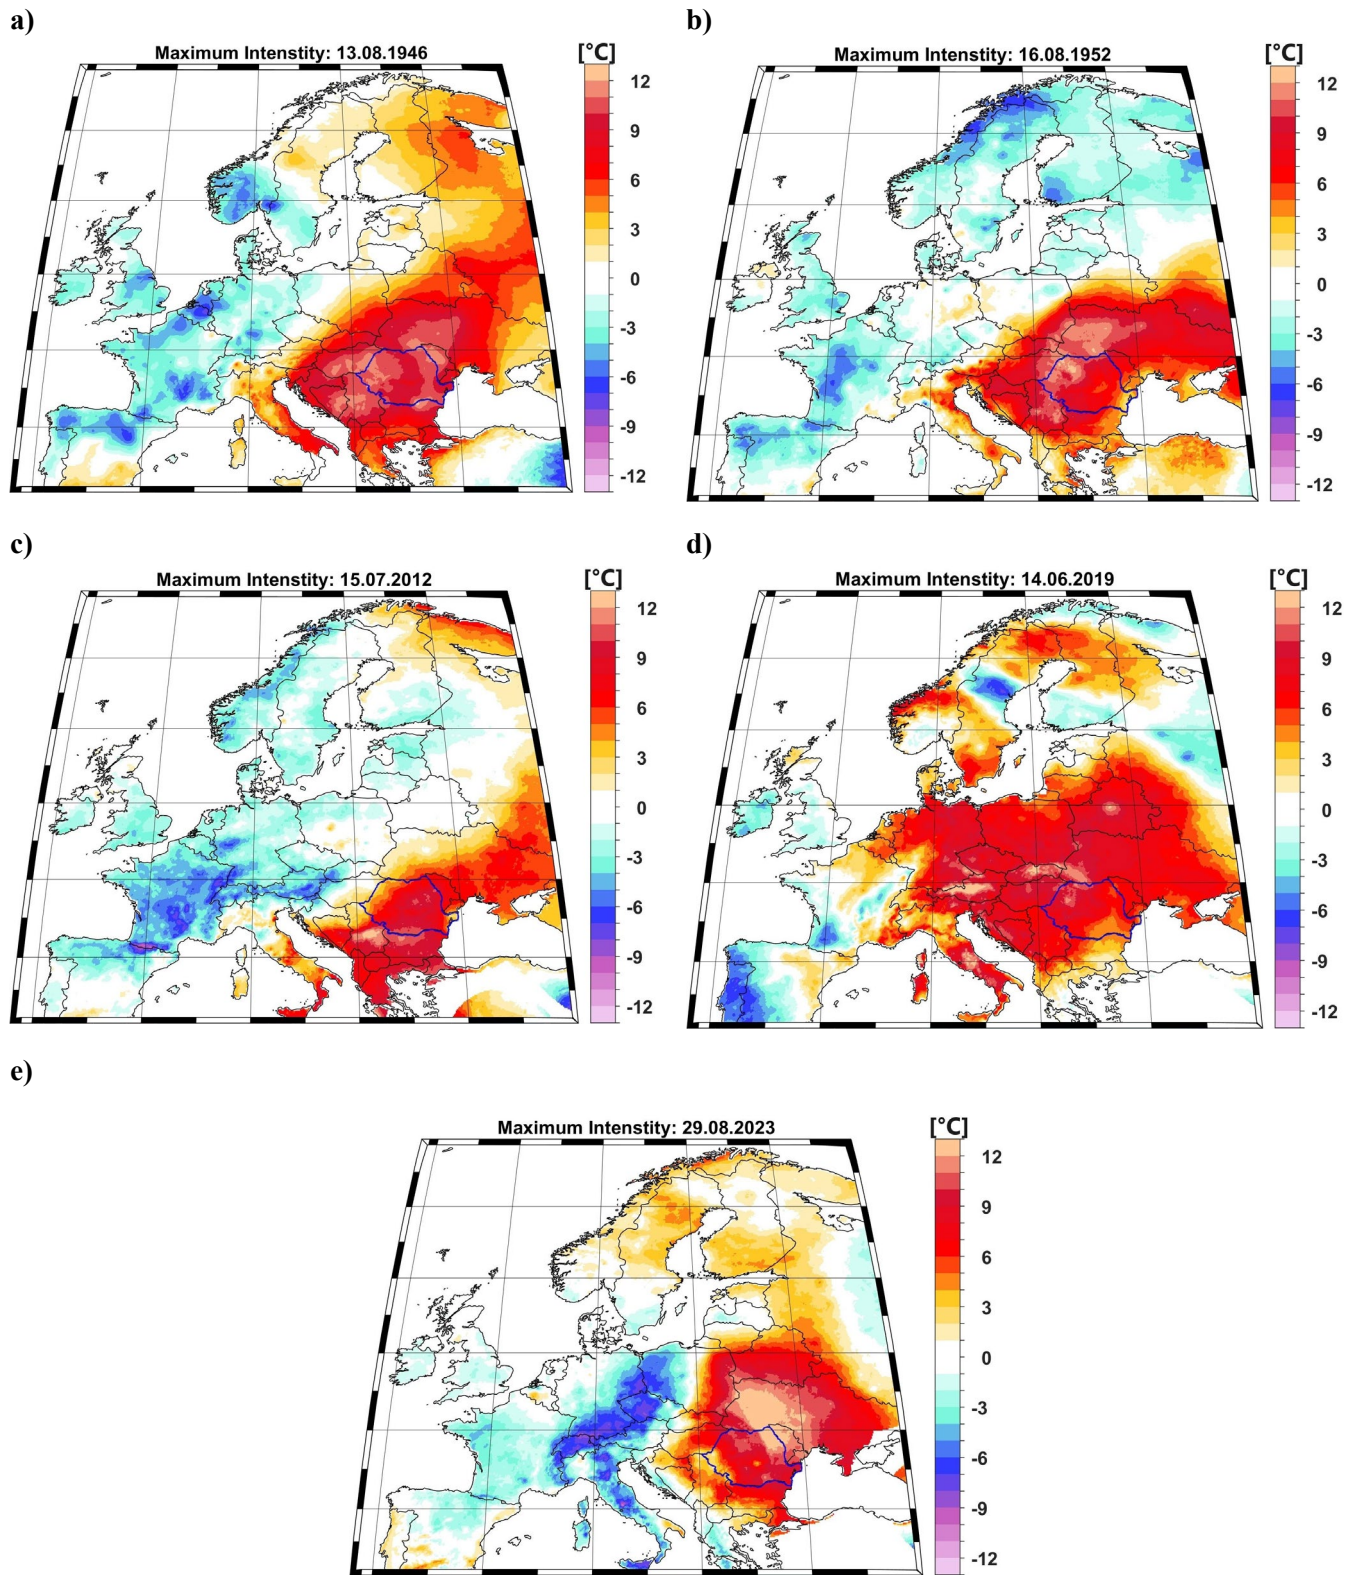

**Figure S4.** Daily maximum temperature anomaly on the day of the HW peak for different heatwave events: a) August 1946; c) August 1952; c) June/July 2012; d) June 2019 and e) August 2023. The anomalies are computed relative to the climatological period 1971 – 2000.

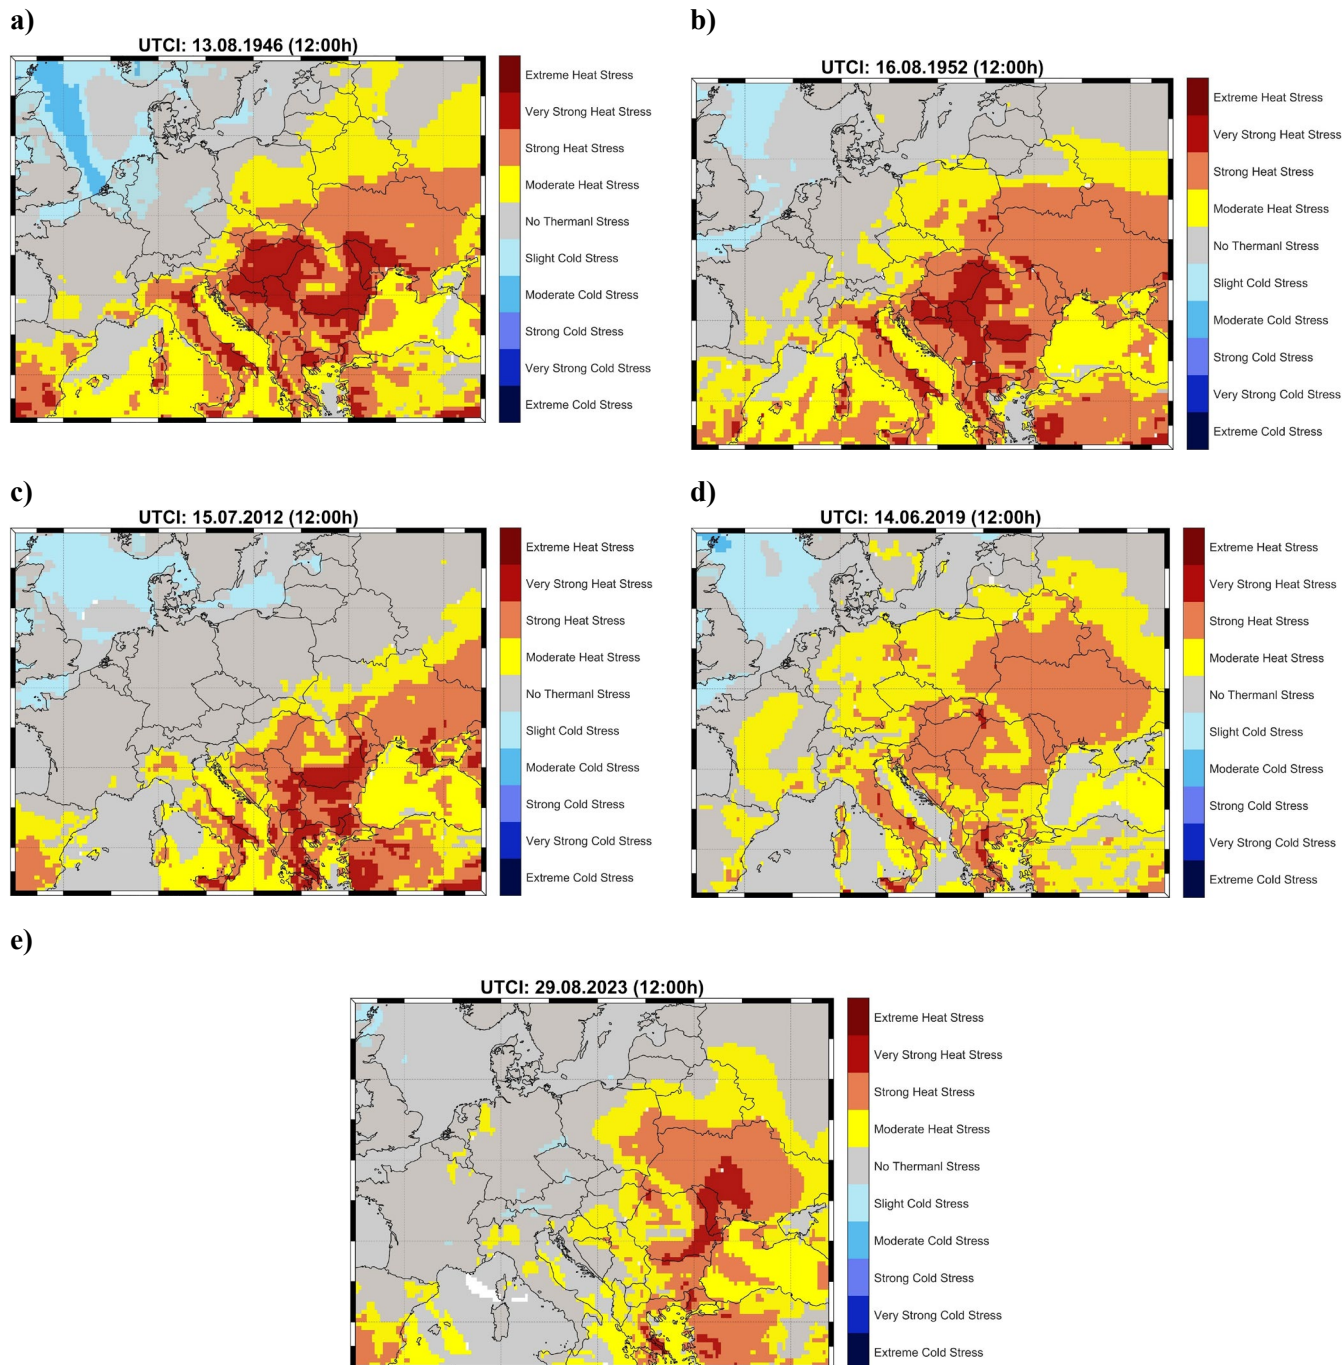

**Figure S5.** The value of the Universal Thermal Climate Index (UTCI) at 12:00 p.m. on the day of the HW, for different HW events: a) August 1946; c) August 1952; c) June/July 2012; d) June 2019 and e) August 2023.



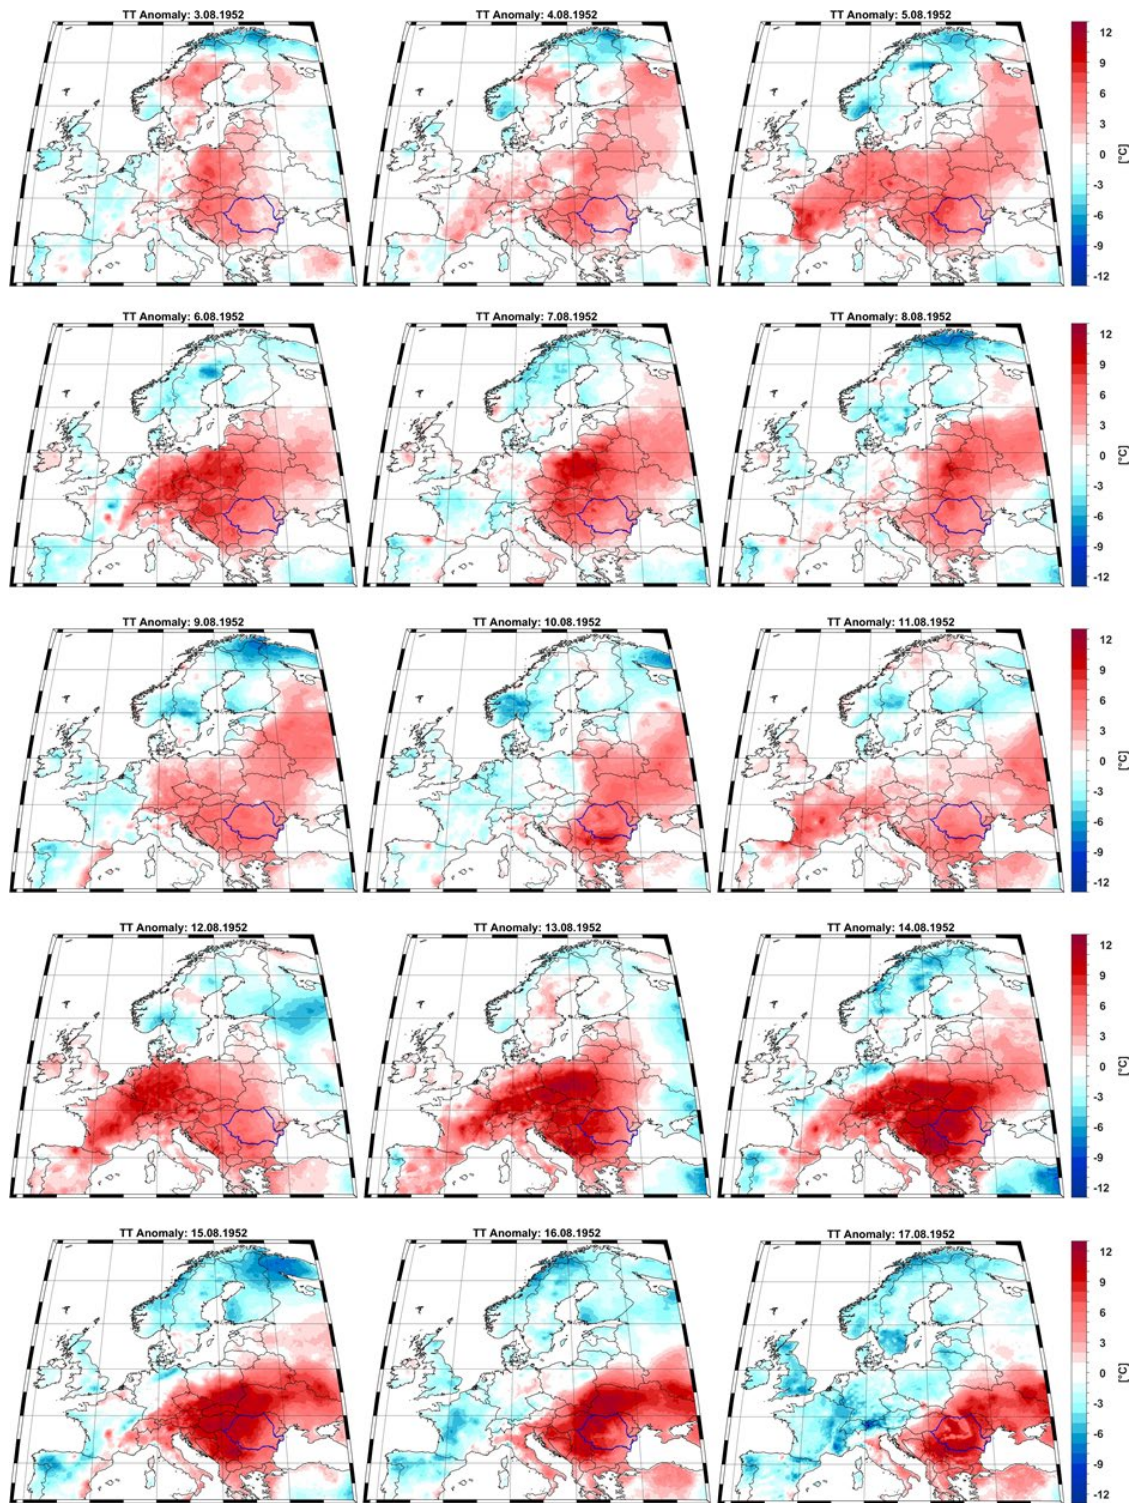

**Figure S6.** Spatial and temporal evolution of the daily maximum temperature anomaly over Europe over the period 3.08.1952 – 17.08.1952. The anomalies are computed relative to the climatological period 1971 – 2000.



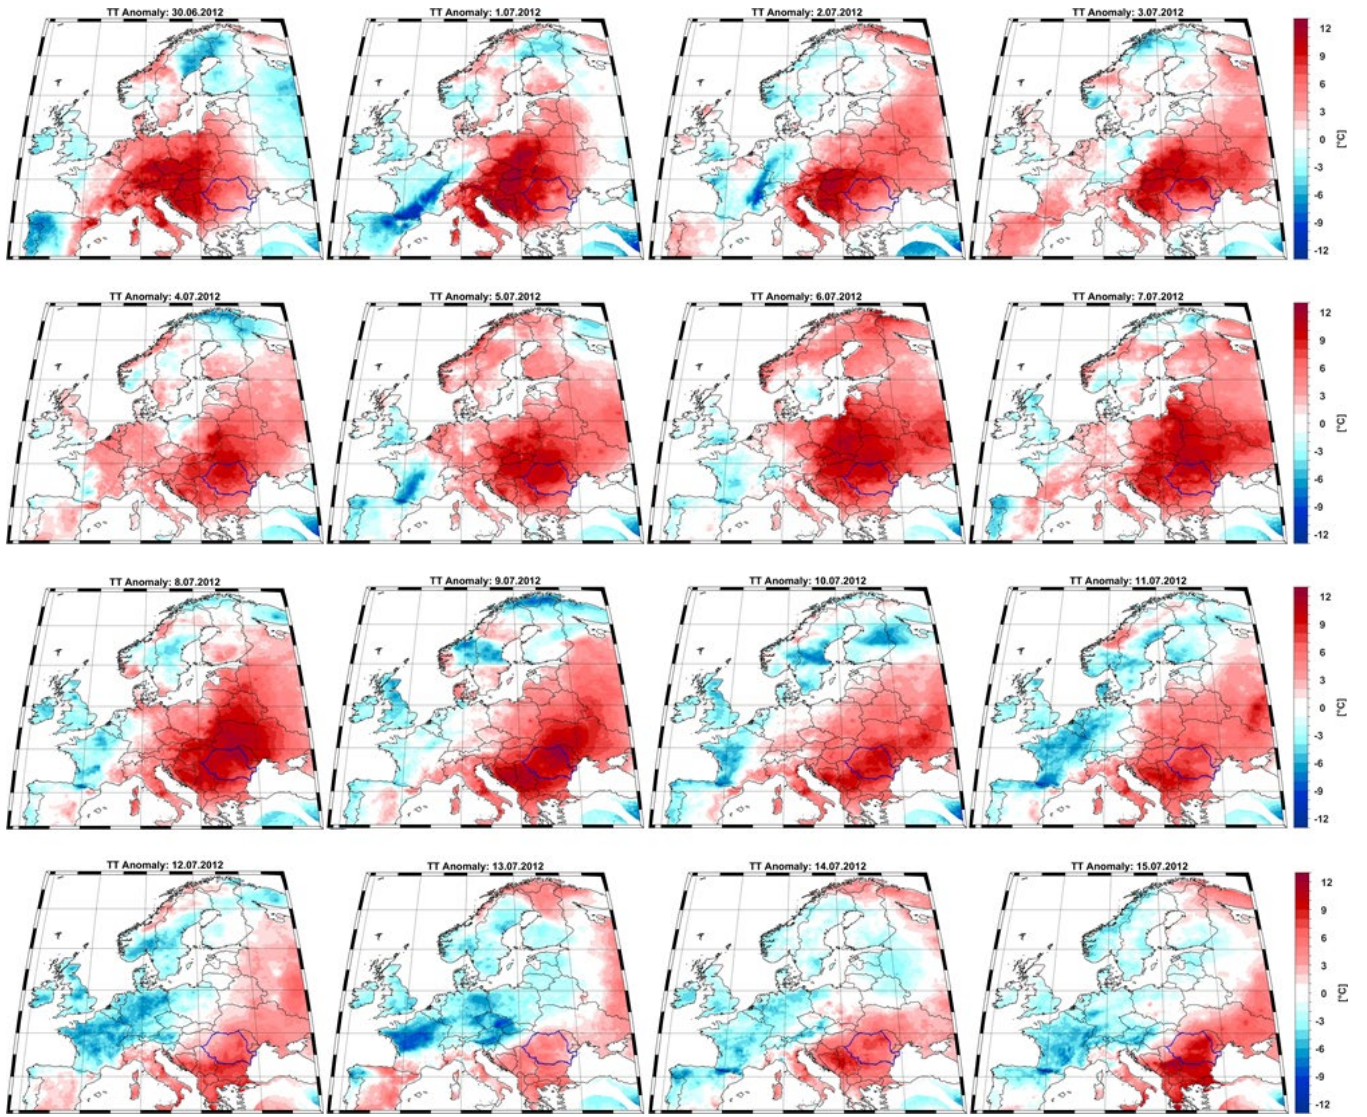

**Figure S7.** Spatial and temporal evolution of the daily maximum temperature anomaly over Europe over the period 30.06.2012 – 15.07.2012. The anomalies are computed relative to the climatological period 1971 – 2000.



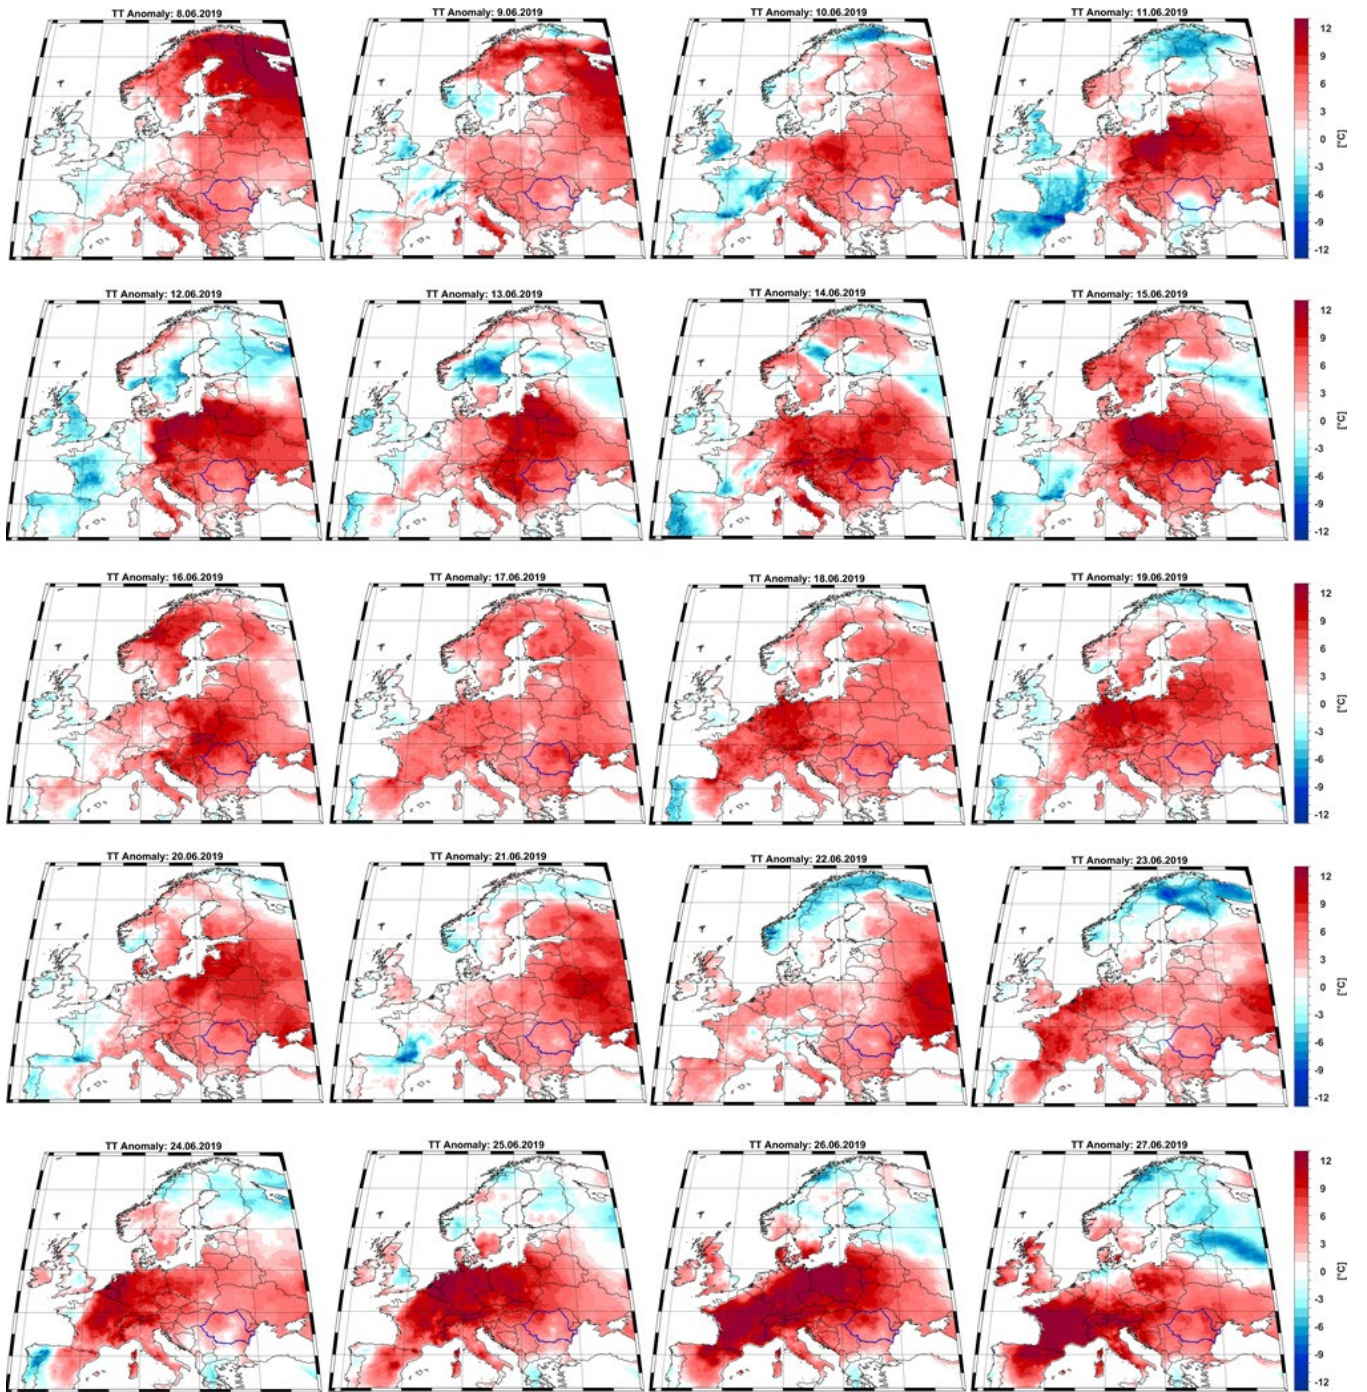

**Figure S8.** Spatial and temporal evolution of the daily maximum temperature anomaly over Europe over the period 12.06.2019 – 27.06.2019. The anomalies are computed relative to the climatological period 1971 – 2000.



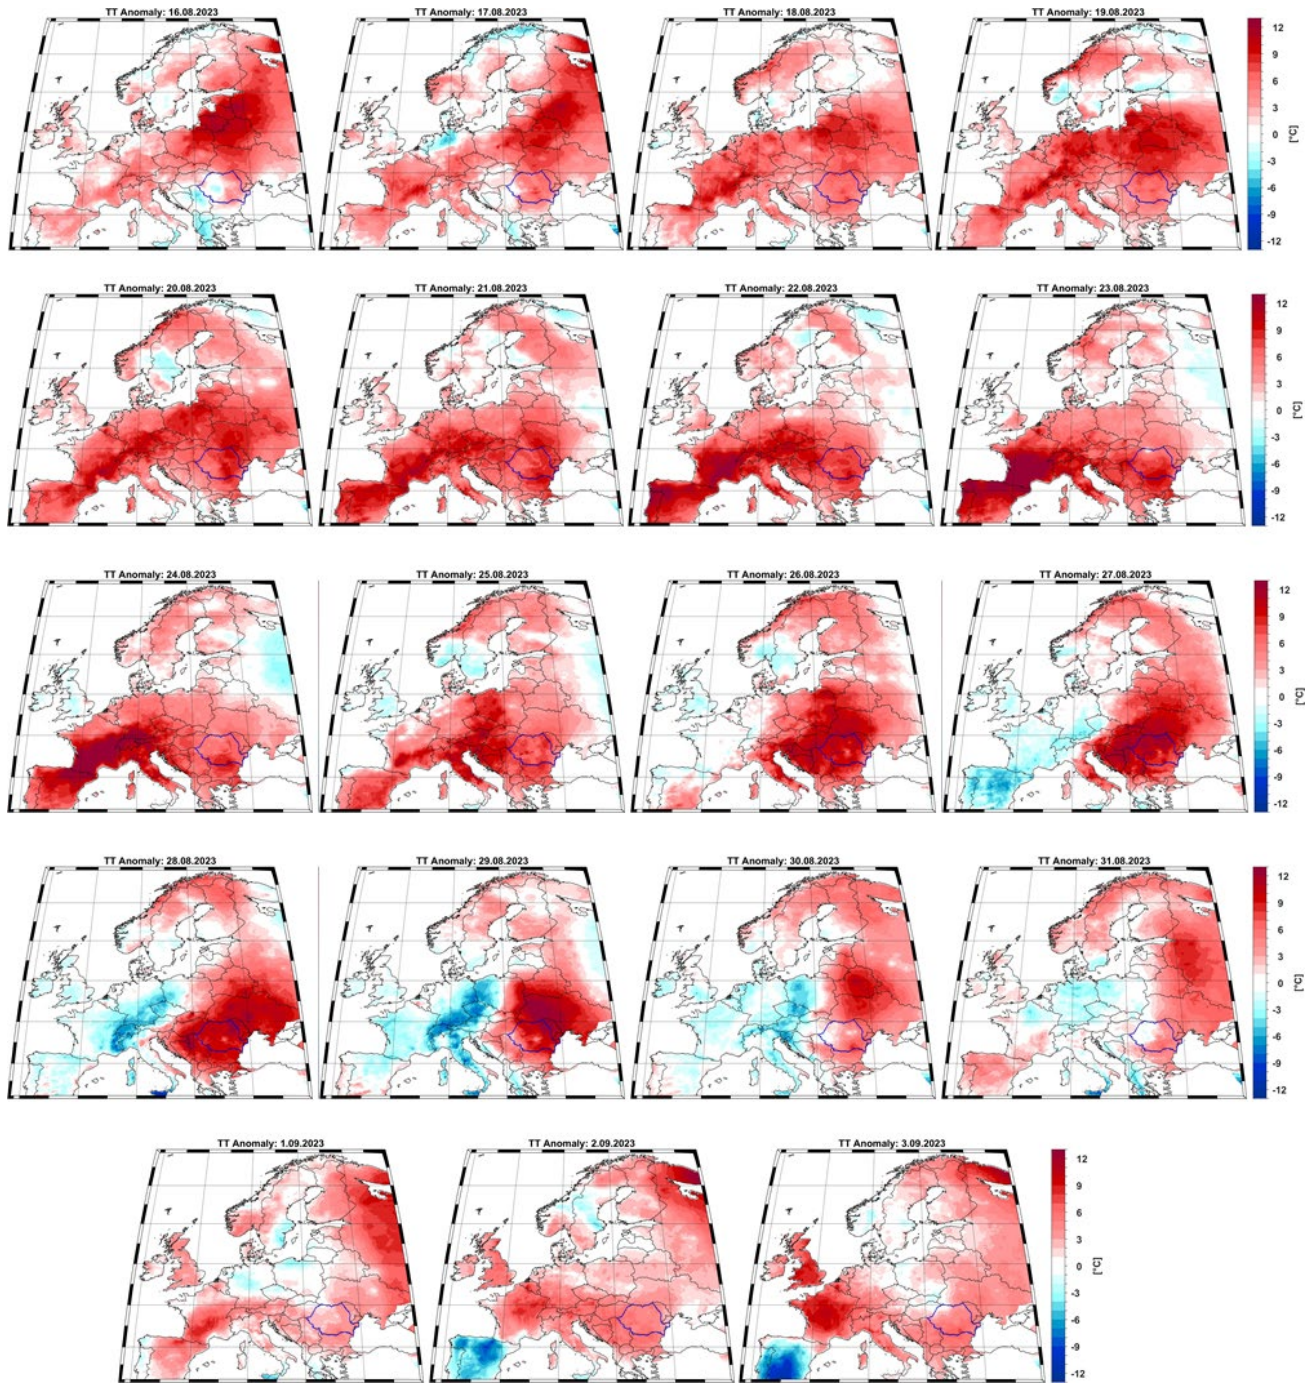

**Figure S9.** Spatial and temporal evolution of the daily maximum temperature anomaly over Europe over the period 16.08.2023 – 3.09.2023. The anomalies are computed relative to the climatological period 1971 – 2000.
